# Supplementary material
Source: MDPI journal article supplement (https://www.mdpi.com/2073-4344/13/1/193)
Supplement: s1 [file s1]

## Supplementary Materials

Integrated photocatalytic oxidation and adsorption process for robust treatment

Refinery wastewater using hybrid  $\text{TiO}_2/\text{AC}$ .

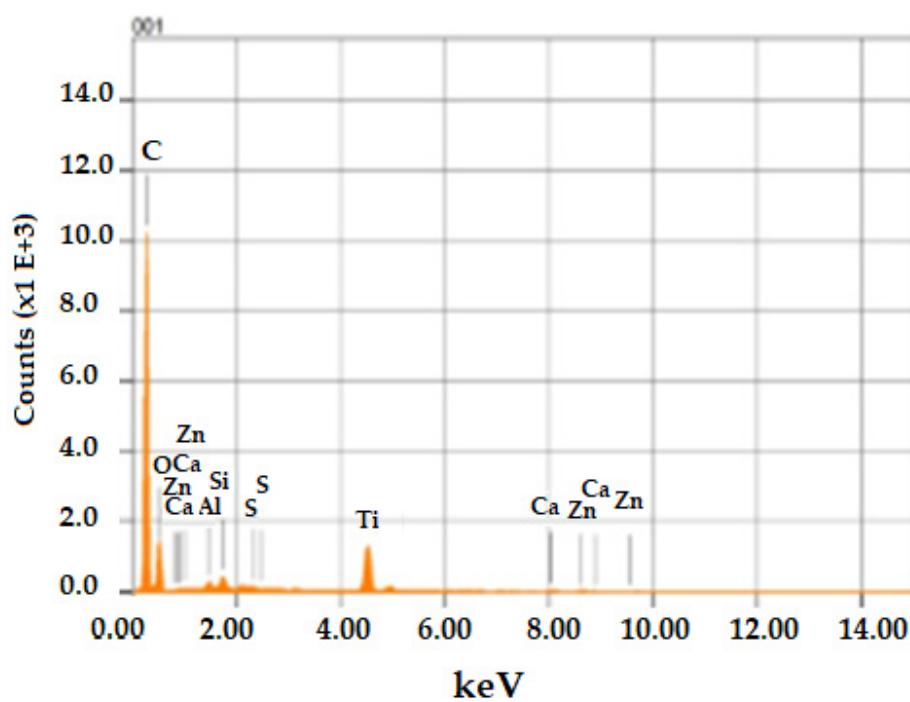

Fig. S1 EDX profile of  $\text{TiO}_2/\text{AC}$ .

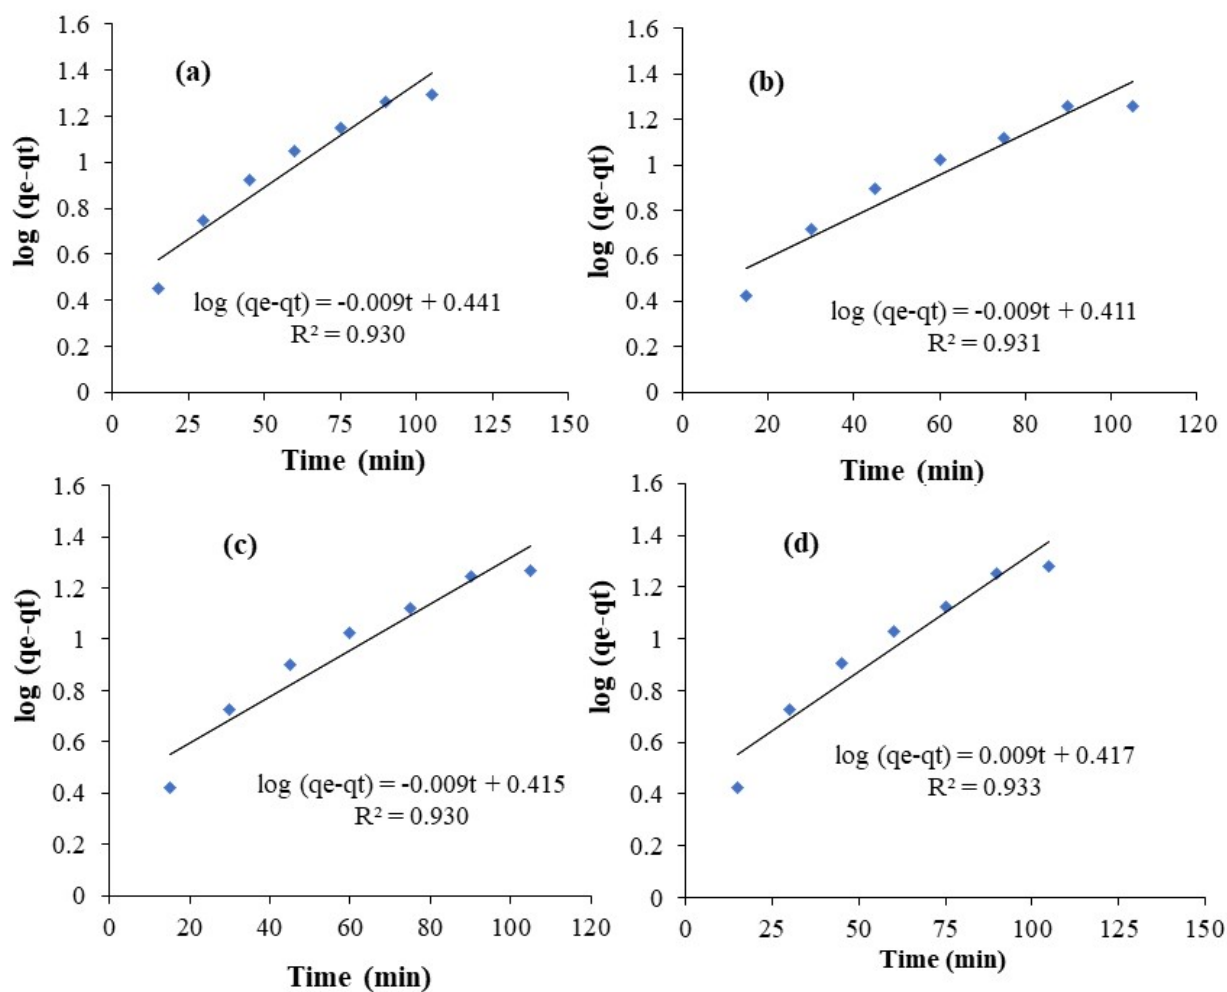

Fig. S2. First order kinetic plots for adsorption of (a) benzene (b) toluene (c) phenol and (d) naphthalene over activated carbon.

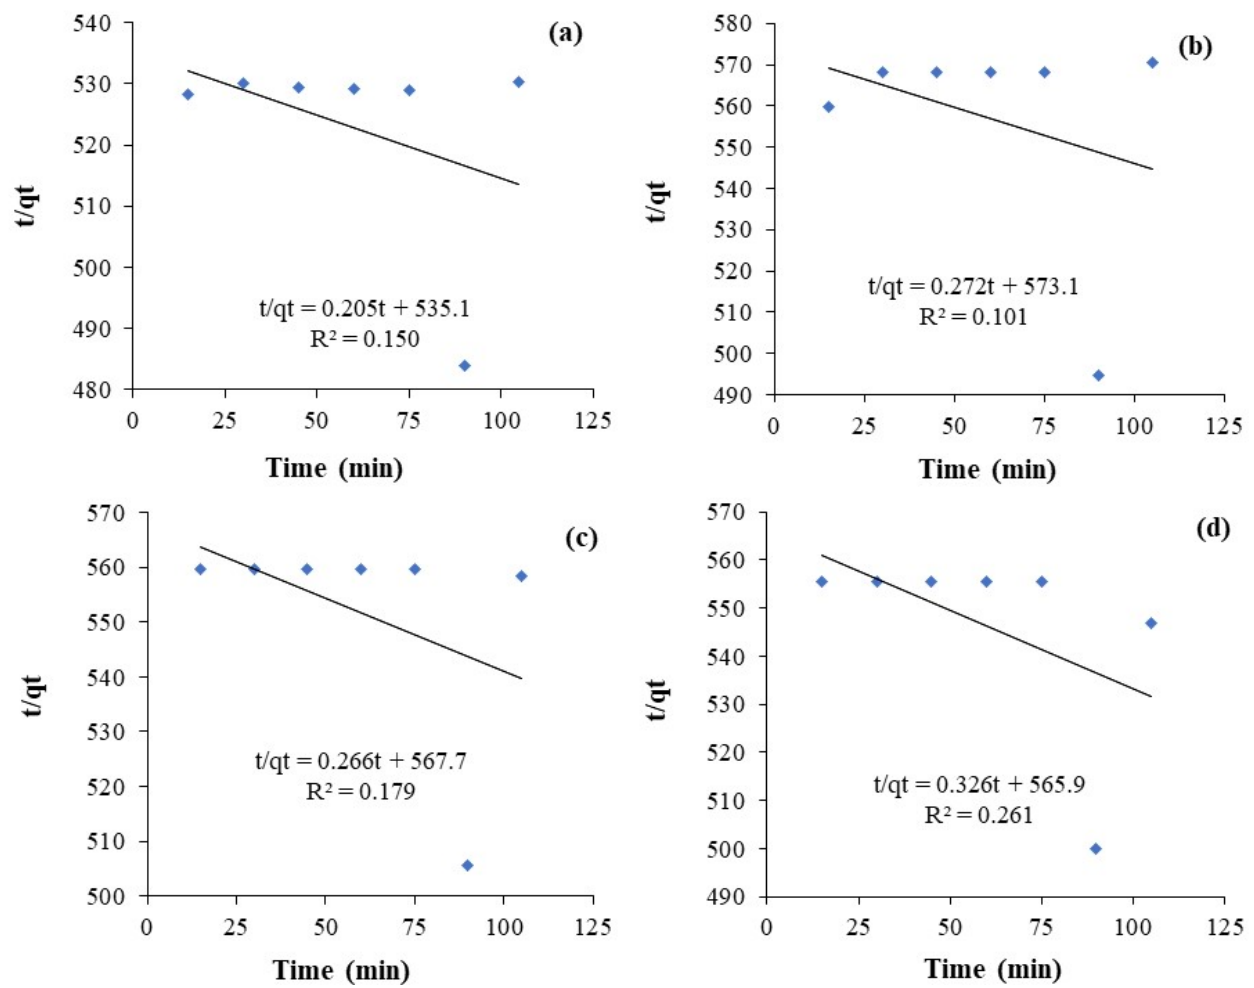

Fig. S3 Second order kinetic plots for adsorption of (a) benzene (b) toluene (c) phenol and (d) naphthalene over activated carbon.

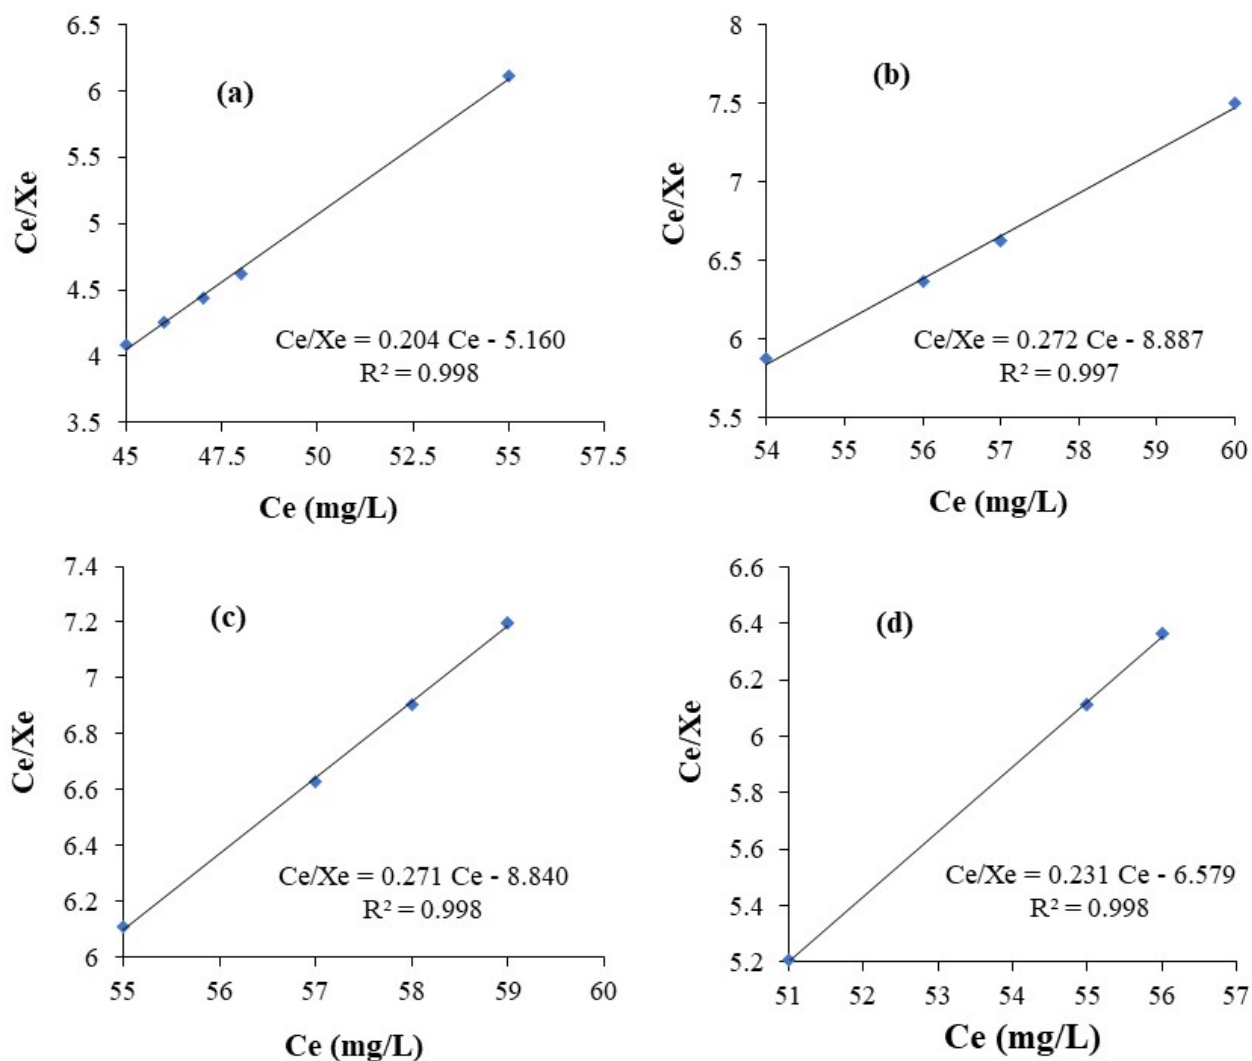

Fig. S4. Langmuir isotherms for Benzene (a), Toluene (b), Phenol (c) and Naphthalene (d) adsorption over activated carbon.

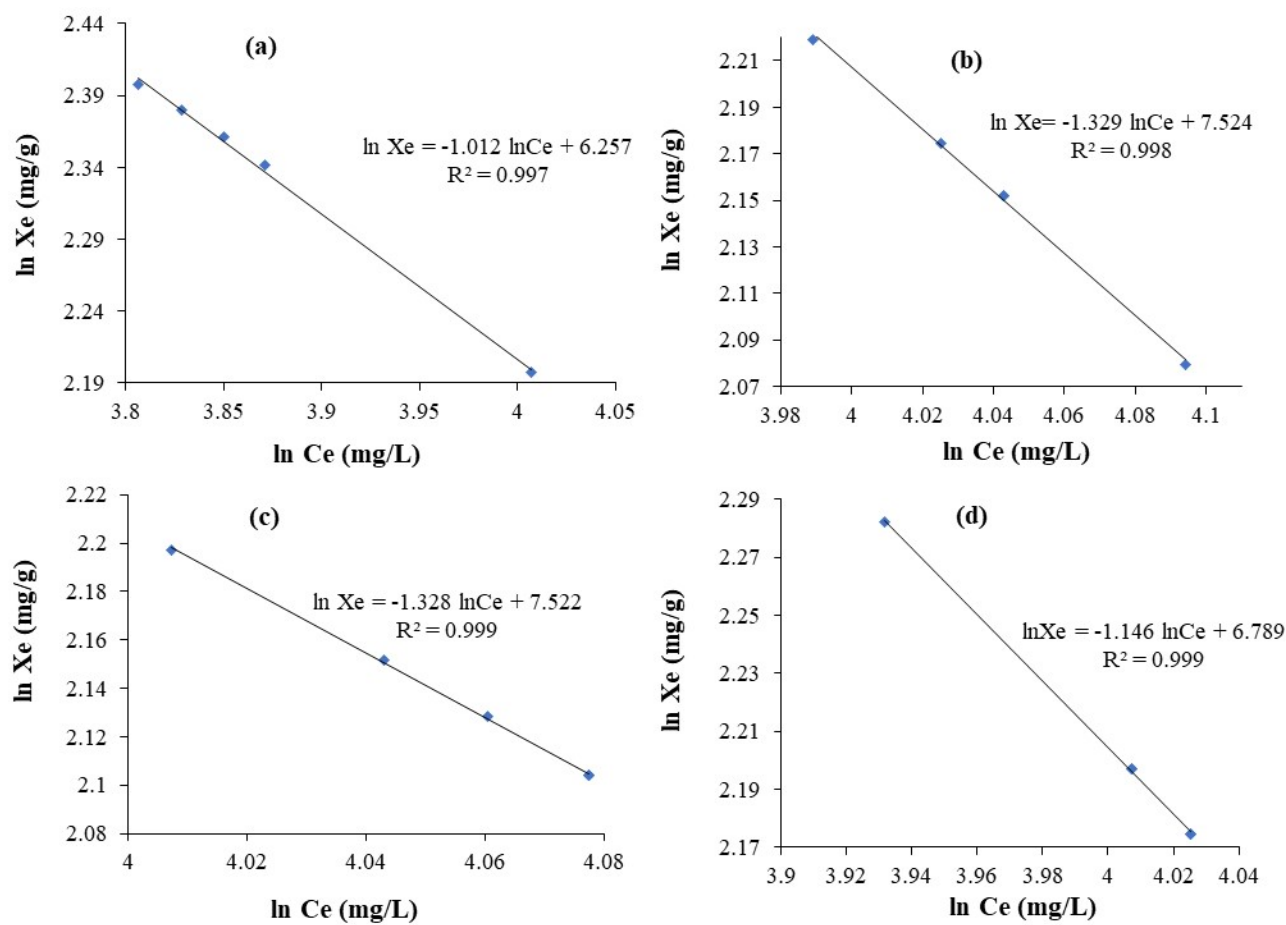

Fig. S5. Freundlich isotherms for Benzene (a), Toluene (b), Phenol (c) and Naphthalene (d) adsorption over activated carbon.

**Table S1. Physiochemical characteristics of refinery wastewater collected from ARL**

| Parameter               | Unit              | Values | Standard limit [1-3] |
|-------------------------|-------------------|--------|----------------------|
| Density                 | g/cm <sup>3</sup> | 1.01   | -                    |
| pH                      |                   | 9.2    | 6-9                  |
| Turbidity               | NTU               | 55     | -                    |
| Electrical conductivity | µs/cm             | 2230   | -                    |
| Phenol content          | mg/L              | 15     | -                    |
| Total Organic Carbon    | mg/L              | 450    | -                    |
| BOD                     | mg/L              | 1400   | -                    |
| COD                     | mg/L              | 970    | 100-200              |
| Suspended solids        | mg/L              | 42.3   | 30-70                |
| Total dissolved solid   | mg/L              | 1220   | -                    |

**Table. S2 Hydrocarbons identified by GC-MS analysis in untreated and treated refinery wastewater sample.**

| Retention time (min) | Compound name                                   | Peak area (%) |         |   |   |
|----------------------|-------------------------------------------------|---------------|---------|---|---|
|                      |                                                 | A*            | B       | C | D |
| 1.3                  | Toluene                                         | 0.94456       | -       | - | - |
| 1.79                 | Cyclopentane, (2-methylbutyl)                   | 0.61027       | -       | - | - |
| 2.14                 | p-Xylene                                        | 2.24185       | -       | - | - |
| 2.43                 | Nonane                                          | 1.98624       | -       | - | - |
| 2.83                 | 1-Dodecanol, 3,7,11-trimethyl                   | 1.70494       | -       | - | - |
| 3.24                 | Benzene, 1-ethyl-3-methyl                       | 5.10822       | -       | - | - |
| 3.67                 | Benzene, (1,3,3-trimethylnonyl)                 | 5.92839       | -       | - | - |
| 3.71                 | Stearic acid, 3-(octadecyloxy)propyl ester      | -             | 0.00729 | - | - |
| 4.03                 | Benzene, 1,3-diethyl                            | 3.27144       | -       | - | - |
| 4.48                 | Benzene, 1,3-diethyl                            | 3.05869       | -       | - | - |
| 5.09                 | Undecane                                        | 6.01362       | -       | - | - |
| 5.95                 | Octadecane, 1-chloro-                           | 2.05911       | -       | - | - |
| 6.48                 | Dodecane                                        | 5.95515       | -       | - | - |
| 7.46                 | Tetradecane, 2,6,10-trimethyl-                  | 3.85526       | -       | - | - |
| 7.8                  | Tridecane                                       | 7.55008       | -       | - | - |
| 7.84                 | Cyclopenta-dodecahydro-pentamethyl pentaacetate | -             | 0.00926 | - | - |
| 8.82                 | Tetradecane, 2,6,10-trimethyl                   | 3.12976       | -       | - | - |
| 9.13                 | Tetradecane                                     | 8.01044       | -       | - | - |
| 9.13                 | 9,12,15-Octadecatrienoic acid                   | -             | 0.01503 | - | - |
| 9.88                 | Hexadecane                                      | 3.80074       | -       | - | - |
| 10.35                | Pentadecane                                     | 4.47568       | -       | - | - |
| 10.94                | Naphthalene, 2,3,6-trimethyl-                   | 3.91445       | -       | - | - |
| 11.49                | Hexadecane                                      | 3.99691       | -       | - | - |
| 12.04                | Octadecane                                      | 2.74804       | -       | - | - |
| 12.63                | Heptadecane                                     | 5.05087       | -       | - | - |
| 13.2                 | Cyclohexane, (1-octylnonyl)-                    | 1.46599       | -       | - | - |
| 13.67                | Octadecane                                      | 2.68821       | -       | - | - |
| 14.26                | Cholesta-5,7,9(11)-trien-3-ol acetate           | 0.65371       | -       | - | - |
| 14.65                | 17-Pentatriacontene                             | 1.7999        | -       | - | - |
| 15.58                | Eicosane                                        | 0.8766        | -       | - | - |
| 15.97                | Phenanthrene, 2,3-dimethyl-                     | 0.31014       | -       | - | - |
| 16.26                | N-Normethadol                                   | 0.08388       | -       | - | - |
| 16.52                | Heneicosane                                     | 0.54233       | -       | - | - |
| 17.01                | Phenanthrene, 2,3,5-trimethyl-                  | 0.58692       | -       | - | - |

|       |                                             |         |   |   |   |
|-------|---------------------------------------------|---------|---|---|---|
| 17.38 | Docosane                                    | 0.60736 | - | - | - |
| 18.23 | Tricosane                                   | 0.37202 | - | - | - |
| 18.54 | Olean-12-ene-3,16,21,22,23,28-hexol         | 0.03436 | - | - | - |
| 19.03 | Tetracosane                                 | 0.30716 | - | - | - |
| 19.31 | 1-Hexacosanol                               | 0.03247 | - | - | - |
| 19.8  | Pentacosane                                 | 0.41845 | - | - | - |
| 20.23 | Oleic acid, 3-(octadecyloxy)propyl ester    | 0.13348 | - | - | - |
| 20.55 | Nonacosane                                  | 0.28062 | - | - | - |
| 20.98 | Tetracosahexaene 2,6,10,15,19,23-hexamethyl | 0.05879 | - | - | - |
| 21.27 | Heptacosane                                 | 0.22003 | - | - | - |
| 21.53 | 17-Pentatriacontene                         | 0.10788 | - | - | - |
| 21.98 | Tetratetracontane                           | 0.39009 | - | - | - |
| 22.65 | Cholestan-3-ol, 5-chloro-6-nitro            | 0.31007 | - | - | - |
| 23.32 | Cholestan-26-oic acid 3,7,12-trihydroxy     | 0.37756 | - | - | - |
| 23.97 | Octadecane, 3-ethyl-5-(2-ethylbutyl)        | 1.89004 | - | - | - |

\*(A) Refinery wastewater sample, (B) Refinery wastewater treated by adsorption over AC, (C) Refinery wastewater treated by photo-oxidation by UV/TiO<sub>2</sub> (D) Refinery wastewater treated by integrated photo-oxidation and adsorption over TiO<sub>2</sub>/AC.

## Refernces

- [1] M.L. Hami, M. Al-Hashimi, M. Al-Doori, Effect of activated carbon on BOD and COD removal in a dissolved air flotation unit treating refinery wastewater, *Desalination*, 216 (2007) 116-122.
- [2] F. Ma, J.-b. Guo, L.-j. Zhao, C.-c. Chang, D. Cui, Application of bioaugmentation to improve the activated sludge system into the contact oxidation system treating petrochemical wastewater, *Bioresour. Technol.* 100 (2009) 597-602.
- [3] F. Santos, E. Azevedo, M. Dezotti, Photocatalysis as a tertiary treatment for petroleum refinery wastewaters, *Braz. J. Chem. Eng.* 23 (2006) 451-460.
